# Supplementary material for: A molecular dynamics study of 1,1-diamino-2,2-dinitroethylene (FOX-7) crystal using a symmetry adapted perturbation theory-based intermolecular force field
Source: Royal Society of Chemistry journal article supplement (doi:10.1039/c1cp21342c), 2011-01-01
Supplement: c1cp21342c.pdf [file c1cp21342c.pdf]

**Table A-1** Multipole moments and static polarizabilities (in a.u.) of the FOX-7 monomer in Cartesian form. Only low order moments are shown however contributions through  $L=7$  were used in computation of the asymptotic energies.

---

*FOX-7 monomer coordinates in atomic units (center of mass at origin) corresponding to moments presented below :*

|   |          |          |          |
|---|----------|----------|----------|
| C | -0.05429 | 0.02885  | -0.04153 |
| C | -2.44240 | -0.86246 | 0.98948  |
| N | 0.41496  | 0.33671  | -2.62400 |
| N | 2.00944  | 0.54773  | 1.61696  |
| O | 2.39533  | 1.40802  | -3.35334 |
| O | -1.22121 | -0.36840 | -4.17201 |
| O | 1.54626  | 1.41298  | 3.74813  |
| O | 4.21094  | 0.06732  | 0.95781  |
| N | -4.28576 | -1.60356 | -0.51621 |
| H | -5.73892 | -2.13239 | 0.10629  |
| H | -4.10208 | -1.58619 | -2.15189 |
| N | -2.78399 | -1.03253 | 3.46495  |
| H | -4.15580 | -1.58619 | 4.02571  |
| H | -1.74212 | -0.41929 | 4.49441  |

*Dipole:*

$$\mu_z = 1.431031459$$

$$\mu_x = -3.232299188$$

$$\mu_y = -1.200439329$$

*Quadrupole:*

$$\Theta_{xx} = 7.089181685$$

$$\Theta_{yy} = -0.026275395$$

$$\Theta_{zz} = -7.062906290$$

$$\Theta_{xy} = 4.461641208$$

$$\Theta_{xz} = -6.449349686$$

$$\Theta_{yz} = -2.396866480$$

*Static polarizabilities*

---

*Dipole-dipole:*

|     |           |
|-----|-----------|
| x x | 94.842290 |
| x y | 14.666980 |
| x z | -3.549274 |
| y y | 51.919650 |
| y z | 0.372805  |
| z z | 94.329090 |

*Dipole-quadrupole:*

|      |            |
|------|------------|
| x xx | -25.421340 |
| x xy | -43.771720 |
| x xz | 7.077876   |
| x yy | 13.097790  |
| x yz | -24.523518 |
| x zz | 12.323550  |
| y xx | -38.161159 |
| y xy | -33.500910 |
| y xz | -11.839840 |
| y yy | -8.265131  |
| y yz | 11.442672  |
| y zz | 46.426290  |
| z xx | -5.321900  |
| z xy | 7.718745   |
| z xz | -43.223267 |
| z yy | 2.901502   |

z yz 13.021558

z zz 2.420398

*Quadrupole-quadrupole:*

xx xx 2939.828600

xx xy 197.319712

xx xz 30.898974

xx yy -653.207000

xx yz -82.076733

xx zz -2286.621600

xy xy 1191.406500

xy xz -83.816550

xy yy 220.883602

xy yz -51.762007

xy zz -418.203314

xz xz 2412.473250

xz yy 27.840003

xz yz 585.509850

xz zz -58.738977

yy yy 1184.852400

yy yz 7.635147

yy zz -531.645400

yz yz 1300.629750

yz zz 74.441585

zz zz 2818.267000

**Table A-2.** Coordinates (Angstroms) of the FOX-7 monomer (R enantiomer) used in potential fitting and simulation. The S configuration is generated by reflection of the atomic coordinates below through the *xz* plane.

|     |          |          |          |
|-----|----------|----------|----------|
| C1  | -0.02155 | 0.01502  | 0.02857  |
| C2  | 0.53064  | -0.45663 | 1.29036  |
| N3  | -1.38939 | 0.17793  | -0.21164 |
| N4  | 0.85035  | 0.2896   | -1.06713 |
| N5  | -0.26101 | -0.8488  | 2.26997  |
| N6  | 1.84152  | -0.54663 | 1.46426  |
| O7  | -1.78082 | 0.74484  | -1.25755 |
| O8  | -2.20401 | -0.19519 | 0.65844  |
| O9  | 1.97937  | 0.74746  | -0.82794 |
| O10 | 0.49545  | 0.03538  | -2.23025 |
| H11 | 0.07243  | -1.12864 | 3.0372   |
| H12 | -1.12705 | -0.83961 | 2.1773   |
| H13 | 2.14205  | -0.83961 | 2.18861  |
| H14 | 2.38338  | -0.22212 | 0.91008  |

**Table A-3.** Atomic charges corresponding to atom labeling in Table A-2.

| <u>Atom</u> | <u>CHARGE (a.u.)</u> |
|-------------|----------------------|
| C1          | -0.4100270           |
| C2          | 0.7362470            |
| N3          | 0.6745610            |
| N4          | 0.7220050            |
| N5          | -0.8923120           |
| N6          | -0.9515670           |
| O7          | -0.3605990           |
| O8          | -0.4836020           |
| O9          | -0.4675610           |
| O10         | -0.3729130           |
| H11         | 0.4209090            |
| H12         | 0.4655270            |
| H13         | 0.4564320            |
| H14         | 0.4629000            |

**Table A-4.** Potential parameters for R-R interactions.

| i | j | A <sub>ij</sub> (kcal/mol) | B <sub>ij</sub> (Ang) | C <sub>ij</sub> (Ang <sup>6</sup> * kcal/mol) |
|---|---|----------------------------|-----------------------|-----------------------------------------------|
| C | C | 764046.0121                | 0.2086                | 0.0801                                        |
| C | N | 72.8379                    | 0.1816                | 19.0796                                       |
| C | O | 88075.9408                 | 0.2529                | 250.2805                                      |
| C | H | 3879.6614                  | 0.3185                | 204.8703                                      |
| N | N | 111518.8046                | 0.2775                | 822.6244                                      |
| N | O | 5658.5589                  | 0.3329                | 645.8825                                      |
| N | H | 10158.7541                 | 0.2491                | 0.2165                                        |
| O | O | 88046.0549                 | 0.2425                | 129.6677                                      |
| O | H | 73731.6262                 | 0.2196                | 278.7350                                      |
| H | H | 11.2533                    | 0.7838                | 5.7440                                        |

**Table A-5.** Potential parameters for R-S interactions.

| i | j | A <sub>ij</sub> (kcal/mol) | B <sub>ij</sub> (Ang) | C <sub>ij</sub> (Ang <sup>6</sup> * kcal/mol) |
|---|---|----------------------------|-----------------------|-----------------------------------------------|
| C | C | 512900.0918                | 0.2501                | 0.0732                                        |
| C | N | 60.4168                    | 0.1845                | 12.7313                                       |
| C | O | 67862.0867                 | 0.2467                | 169.1749                                      |
| C | H | 2577.8179                  | 0.2844                | 204.7925                                      |
| N | N | 80398.8032                 | 0.2827                | 1116.5450                                     |
| N | O | 6696.2147                  | 0.3711                | 903.9598                                      |
| N | H | 14899.0853                 | 0.2263                | 0.3438                                        |
| O | O | 82609.7660                 | 0.2525                | 243.1237                                      |
| O | H | 42344.2009                 | 0.2104                | 252.6077                                      |
| H | H | 7.4991                     | 0.5414                | 8.2593                                        |

**Table A-6.** Energy components (kcal/mol) for minima on the RR and RS potential energy surfaces shown in Figures 5 and 6. Note that the induction energy includes the higher order induction/exchange-induction contribution extracted from the supermolecular approach. The tabulated exchange energy contains the first order exchange and second order exchange-induction and exchange-dispersion contributions.

| <b><u>Energy/Structure</u></b> | <b><u>RR1</u></b> | <b><u>RR2</u></b> | <b><u>RS1</u></b> | <b><u>RS2</u></b> |
|--------------------------------|-------------------|-------------------|-------------------|-------------------|
| <b>COM distance (Å)</b>        | 3.46              | 4.35              | 3.72              | 6.85              |
| <b>Electrostatic</b>           | -14.965           | -13.182           | -13.476           | -12.672           |
| <b>Induction</b>               | -8.933            | -6.395            | -6.114            | -4.500            |
| <b>Dispersion</b>              | -14.122           | -9.022            | -11.601           | -5.101            |
| <b>Exchange</b>                | 23.707            | 15.925            | 14.811            | 9.193             |
| <b>E<sub>int</sub></b>         | -14.314           | -12.674           | -16.379           | -13.080           |
| <b>Fit</b>                     | -16.141           | -13.298           | -15.328           | -13.508           |

**Table A-7.** Comparison of experimental<sup>29</sup> and predicted molecular structural parameters<sup>a,b</sup> for FOX-7.

| Model             | Crystallographic structural parameters |                |                |              |               |                |
|-------------------|----------------------------------------|----------------|----------------|--------------|---------------|----------------|
|                   | sx                                     | sy             | sz             | $\theta$ (°) | $\phi$ (°)    | $\psi$ (°)     |
| <b>Molecule 1</b> |                                        |                |                |              |               |                |
| <b>Expt.</b>      | <b>0.76459</b>                         | <b>0.17122</b> | <b>0.63938</b> | <b>72.35</b> | <b>178.99</b> | <b>106.64</b>  |
| <b>Theory</b>     | <b>0.77744</b>                         | <b>0.16808</b> | <b>0.63176</b> | <b>70.91</b> | <b>179.29</b> | <b>111.12</b>  |
| <i>Ideal</i>      | <i>0.77744</i>                         | <i>0.16808</i> | <i>0.63176</i> | <i>70.91</i> | <i>179.29</i> | <i>111.12</i>  |
| <b>Molecule 2</b> |                                        |                |                |              |               |                |
| <b>Expt.</b>      | <b>0.73541</b>                         | <b>0.67122</b> | <b>0.86062</b> | <b>72.35</b> | <b>1.01</b>   | <b>-106.64</b> |
| <b>Theory</b>     | <b>0.73344</b>                         | <b>0.66803</b> | <b>0.84637</b> | <b>70.91</b> | <b>0.74</b>   | <b>-105.26</b> |
| <i>Ideal</i>      | <i>0.72256</i>                         | <i>0.66808</i> | <i>0.86824</i> | <i>70.89</i> | <i>0.72</i>   | <i>-111.35</i> |
| <b>Molecule 3</b> |                                        |                |                |              |               |                |
| <b>Expt.</b>      | <b>0.23541</b>                         | <b>0.82878</b> | <b>0.36062</b> | <b>72.35</b> | <b>178.99</b> | <b>106.64</b>  |
| <b>Theory</b>     | <b>0.23182</b>                         | <b>0.83532</b> | <b>0.34646</b> | <b>70.91</b> | <b>179.28</b> | <b>109.42</b>  |
| <i>Ideal</i>      | <i>0.22256</i>                         | <i>0.83192</i> | <i>0.36824</i> | <i>70.91</i> | <i>179.29</i> | <i>111.12</i>  |
| <b>Molecule 4</b> |                                        |                |                |              |               |                |
| <b>Expt.</b>      | <b>0.26459</b>                         | <b>0.32878</b> | <b>0.13938</b> | <b>72.35</b> | <b>1.01</b>   | <b>-106.64</b> |
| <b>Theory</b>     | <b>0.27578</b>                         | <b>0.33542</b> | <b>0.13205</b> | <b>70.91</b> | <b>0.74</b>   | <b>-104.77</b> |
| <i>Ideal</i>      | <i>0.27744</i>                         | <i>0.33192</i> | <i>0.13176</i> | <i>70.89</i> | <i>0.72</i>   | <i>-111.35</i> |

a. Sx, Sy, Sz are center of mass fractional coordinates within the unit cell.

b.  $\theta, \phi, \psi$  are Euler angles describing molecular orientation within the unit cell.
